# Supplementary material
Source: Royal Society of Chemistry journal article supplement (doi:10.1039/d6dt00583g)

## ***Supplementary Materials for***

# **Li<sub>3</sub>GaTe<sub>4</sub>O<sub>11</sub>: Small Ion-Driven Orientation of TeO<sub>n</sub> Units in Tunnel-Structured Tellurite**

**Jingfang Zhou<sup>a§</sup>, Pifu Gong<sup>d§</sup>, Chang Gao<sup>a</sup>, Mingjun Xia<sup>bc</sup>, Jing Yu<sup>a</sup>, Hongxia Zhang<sup>a</sup>, and Qian Wu<sup>bc\*</sup>**

<sup>a</sup> Department of Chemistry, Tangshan Normal University, Hebei Tangshan 063000, China

<sup>b</sup> Beijing Center for Crystal Research and Development, Key Laboratory of Functional Crystals and Laser Technology, Technical Institute of Physics and Chemistry, Chinese Academy of Sciences, Beijing 100190, China

<sup>c</sup> School of Chemical Science, University of Chinese Academy of Sciences, Beijing 100049, China

<sup>d</sup> Functional Crystals Lab, Key Laboratory of Functional Crystals and Laser Technology, Technical Institute of Physics and Chemistry, Chinese Academy of Sciences, Beijing 100049, China

### Contents:

#### 1 ∙ Supplementary tables

Table S1. Atomic coordinates and equivalent isotropic displacement parameters ( $\text{\AA}^2$ ) of Li<sub>3</sub>GaTe<sub>4</sub>O<sub>11</sub>.

Table S2. Bond lengths [ $\text{\AA}$ ] of Li<sub>3</sub>GaTe<sub>4</sub>O<sub>11</sub>.

Table S3. Bond angles [ $^\circ$ ] of Li<sub>3</sub>GaTe<sub>4</sub>O<sub>11</sub>.

Table S4. The bond valence sums (BVS) of Li<sub>3</sub>GaTe<sub>4</sub>O<sub>11</sub>.

#### 2 ∙ Supplementary figures

Figure S1. The PXRD pattern of Li<sub>3</sub>GaTe<sub>4</sub>O<sub>11</sub>.

Figure S2. The PXRD patterns before and after thermal test.

## 1 、 Supplementary tables

Table S1. Atomic coordinates and equivalent isotropic displacement parameters ( $\text{\AA}^2$ ) of  $\text{Li}_3\text{GaTe}_4\text{O}_{11}$ .

| Atom | Wyckoff | x/a         | y/b        | z/c        | U(eq)/( $\text{\AA}^2$ ) | Uani |
|------|---------|-------------|------------|------------|--------------------------|------|
| Te1  | 8f      | 0.83479(2)  | 0.33495(4) | 0.32998(2) | 0.01011(9)               | 1    |
| Te2  | 8f      | 0.55607(2)  | 0.73783(5) | 0.43787(3) | 0.01616(9)               | 1    |
| Ga1  | 4d      | 0.750000    | 0.750000   | 0.500000   | 0.00792(12)              | 1    |
| O1   | 4e      | 0.500000    | 0.6261(8)  | 0.250000   | 0.0298(11)               | 1    |
| O2   | 8f      | 0.56620(15) | 1.0813(5)  | 0.4008(3)  | 0.0175(6)                | 1    |
| O3   | 8f      | 0.64616(14) | 0.6073(5)  | 0.4288(3)  | 0.0130(5)                | 1    |
| O4   | 8f      | 0.77584(14) | 0.4305(5)  | 0.4300(2)  | 0.0103(5)                | 1    |
| O5   | 8f      | 0.76729(14) | 0.4394(5)  | 0.1669(2)  | 0.0109(5)                | 1    |
| O6   | 8f      | 0.88892(17) | 0.6460(5)  | 0.3473(3)  | 0.0190(6)                | 1    |
| Li1  | 8f      | 0.6717(5)   | 0.2439(14) | 0.3832(8)  | 0.0229(16)               | 1    |
| Li2  | 8f      | 0.4788(8)   | 1.232(3)   | 0.2709(14) | 0.019(3)                 | 0.5  |

Table S2. Bond lengths [ $\text{\AA}$ ] of  $\text{Li}_3\text{GaTe}_4\text{O}_{11}$ .

| Atom   | Length/ $\text{\AA}$ | Atom   | Length/ $\text{\AA}$ |
|--------|----------------------|--------|----------------------|
| Te1-O5 | 1.870(2)             | Li1-O5 | 2.130(8)             |
| Te1-O4 | 1.858(2)             | Li1-O3 | 2.046(8)             |
| Te1-O6 | 1.886(3)             | Li1-O4 | 2.099(8)             |
| Te2-O3 | 1.867(3)             | Li1-O4 | 2.121(8)             |
| Te2-O6 | 2.274(3)             | Li1-O2 | 2.233(9)             |
| Te2-O2 | 1.850(3)             | Li1-O6 | 2.412(9)             |
| Te2-O1 | 2.0265(13)           | Li2-O2 | 1.936(14)            |
| Ga1-O5 | 1.975(2)             | Li2-O2 | 1.922(15)            |
| Ga1-O5 | 1.975(2)             | Li2-O1 | 2.108(14)            |
| Ga1-O3 | 1.996(2)             | Li2-O1 | 2.108(14)            |
| Ga1-O3 | 1.996(2)             | Li2-O6 | 2.170(15)            |
| Ga1-O4 | 1.949(2)             |        |                      |

Ga1-O4-

1.949(2)

Table S3. Bond angles [°] of Li<sub>3</sub>GaTe<sub>4</sub>O<sub>11</sub>.

| Atom      | Angle/°    | Atom      | Angle/°  |
|-----------|------------|-----------|----------|
| O5-Te1-O6 | 91.29(12)  | O4-Ga1-O4 | 180.0    |
| O4-Te1-O5 | 96.44(11)  | O5-Li1-O6 | 72.2(2)  |
| O4-Te1-O6 | 97.25(12)  | O5-Li1-O2 | 108.5(3) |
| O3-Te2-O6 | 91.96(11)  | O3-Li1-O5 | 159.3(4) |
| O3-Te2-O1 | 91.50(9)   | O3-Li1-O4 | 78.2(3)  |
| O2-Te2-O3 | 100.11(12) | O3-Li1-O4 | 103.8(4) |
| O2-Te2-O6 | 85.34(12)  | O3-Li1-O6 | 111.8(4) |
| O2-Te2-O1 | 96.76(14)  | O3-Li1-O2 | 92.2(3)  |
| O5-Ga1-O5 | 180.0      | O4-Li1-O5 | 78.6(3)  |
| O5-Ga1-O3 | 90.33(11)  | O4-Li1-O5 | 81.8(3)  |
| O5-Ga1-O3 | 89.67(11)  | O4-Li1-O4 | 82.3(3)  |
| O5-Ga1-O3 | 89.67(11)  | O4-Li1-O6 | 142.6(4) |
| O5-Ga1-O3 | 90.33(11)  | O4-Li1-O6 | 115.3(4) |
| O3-Ga1-O3 | 180.0      | O4-Li1-O2 | 84.6(3)  |
| O4-Ga1-O5 | 86.66(10)  | O4-Li1-O2 | 161.4(4) |
| O4-Ga1-O5 | 93.34(10)  | O2-Li1-O6 | 82.9(3)  |
| O4-Ga1-O5 | 93.35(11)  | O1-Li2-O6 | 116.2(7) |
| O4-Ga1-O5 | 86.65(11)  | O2-Li2-O2 | 121.6(8) |
| O4-Ga1-O3 | 83.04(11)  | O2-Li2-O1 | 108.8(6) |
| O4-Ga1-O3 | 83.04(11)  | O2-Li2-O1 | 109.3(7) |
| O4-Ga1-O3 | 96.96(11)  | O2-Li2-O6 | 103.4(6) |
| O4-Ga1-O3 | 96.96(11)  | O2-Li2-O6 | 97.4(6)  |

Table S4. The bond valence sums (BVS) of Li<sub>3</sub>GaTe<sub>4</sub>O<sub>11</sub>.

| Element | BVS | Element | BVS |
|---------|-----|---------|-----|
|---------|-----|---------|-----|

|     |      |    |       |
|-----|------|----|-------|
| Te1 | 4.07 | O1 | -1.91 |
| Te2 | 3.94 | O2 | -1.82 |
| Ga1 | 3.06 | O3 | -2.03 |
| Li1 | 0.96 | O4 | -2.20 |
| Li2 | 0.86 | O5 | -2.06 |
|     |      | O6 | -1.86 |

## 2、Supplementary figures

Figure S1. The PXRD pattern of  $\text{Li}_3\text{GaTe}_4\text{O}_{11}$ .

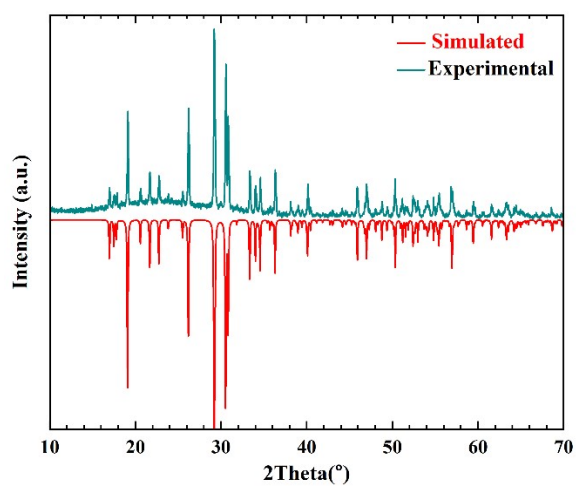

Figure S2. The PXRD patterns before and after thermal test.

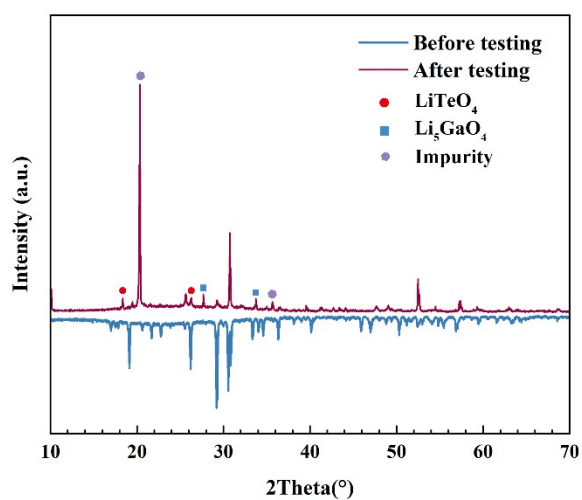

Supplement: d6dt00583g1.pdf [file d6dt00583g1.pdf]
